# Supplementary material for: A de novo FBN1 variant likely causes congenital bilateral ectopia lentis in a crossbred horse
Source: Sci Rep. 2025 Oct 24;15:37238. doi: 10.1038/s41598-025-21139-7 (PMC12552744; doi:10.1038/s41598-025-21139-7)
Supplement: Supplementary file 1 — Supplementary Material 1 [file 41598_2025_21139_MOESM1_ESM.xlsx]

## Sheet: Supplementary Table 1
Supplementary Table 1: Candidate Genes Investigated for Ectopia Lentis in a Crossbred Foal
Gene	NCBI Gene ID	Chromosome	Start	End	References
AASS	100056260	4	78454012	78507437	Sadiq and Vanderveen 2013
ADAMTS2	100630632	14	2315598	2531067	Sadiq and Vanderveen 2013
ADAMTS10	100147003	7	54839383	54860443	Dagoneau et al 2004
ADAMTS17	100056538	1	106146049	106484463	Farias et al. 2010; Oliver et al. 2018
ADAMTS18	100069320	3	26439486	26565191	Chandra et al. 2014
ADAMTSL4	100059096	5	43203360	43214180	Aragon-Martin et al. 2010; Guo et al. 2022; Knight et al. 2022
ASPH	100065909	9	23611351	23820549	Patel et al 2014; Kulkarni et al 2019
CBS	100057612	26	39686527	39709695	Chandra and Charteris 2014 (review article)
COL1A1	100033877	11	25987230	26004612	Sadiq and Vanderveen 2013
COL1A2	100051715	4	38028123	38063219	Sadiq and Vanderveen 2013
COL18A1	100055712	26	41808004	41917526	Chandra and Charteris 2014 (review article)
COL2A1	791241	6	66515614	66546985	Mullany et al. 2022
COL3A1	104795277	18	65602109	65602247	Sadiq and Vanderveen 2013
COL5A1	100069057	25	37215696	37385418	Sadiq and Vanderveen 2013
COL5A2	100054421	18	65663170	65804357	Sadiq and Vanderveen 2013
CPAMD8*	100069965	21	2661552	2704516	Cheong et al. 2016
CYP1B1	100070088	15	60733523	60741918	Mullany et al. 2022
DLG4	100061544	11	50555413	50579022	Mullany et al. 2022
FBN1	100055741	1	142252372	142480079	Kainulainen et al. 1994; Ades et al. 2004; Faivre et al. 200 7; Chen et al. 2021; Huang et al. 2023
FBN2	100073031	14	45536216	45774131	Mullany et al. 2022
FLCN	100052790	11	60921588	60941030	Mullany et al. 2022
FOXC1	111769235	20	2378943	2382435	Mullany et al. 2022
FOXE3	111770846	2	11197949	11204175	Mullany et al. 2022
HSPG2	100071701	2	32818813	32917816	Lin et al. 2021
LTBP2	100056889	24	19960932	20060074	Desir et al. 2010; Bergmann et al. 2023
MMACHC	100065336	2	12970970	12975300	Mullany et al. 2022
MTHFR	100050979	2	40055953	40070617	Couser et al. 2017
MYH11	100050346	13	31021298	31139159	Gentilini et al. 2019
OAF	100071480	7	28454451	28471973	David et al. 2018
P3H2	100059777	19	29886171	30039111	Mullany et al. 2022
PAX6	100146390	7	99780796	99812573	Chandra and Charteris 2014 (review article)
PITX2	100146441	2	115769084	115788664	Mullany et al. 2022
PITX3	100060046	1	28072815	28075555	Mullany et al. 2022
PLOD1	100050902	2	39926928	39953350	Sadiq and Vanderveen 2013
PORCN	100051598	X	40532819	40543875	Mullany et al. 2022
PRDX1	100052421	2	12958689	12970024	Mullany et al. 2022
NECTIN1 (previously termed PVRL1)	100063411	7	27923408	27990071	David et al. 2018
PXDN	100072948	15	91363130	91450146	Mullany et al. 2022
SKI	100033833	2	47829112	47906834	Mullany et al. 2022
SUOX	100059135	6	74603046	74607326	Li et al. 2022
TGFB2	100050377	30	14367529	14449575	Braverman et al. 2020
TGFB3	100051765	24	21412497	21434025	Mullany et al. 2022
TGFBR1	100034117	25	5874739	5940124	Braverman et al. 2020
TGFBR2	100033860	16	54855976	54966338	Attias et al. 2009
VCAN	100065275	14	83301871	83407254	Mullany et al. 2022
VSX2	100056601	24	19776275	19795980	Chandra and Charteris 2014 (review article)
*This annotation and record was withdrawn and discontinued by NCBI in 2019. No annotation has replaced the withdrawn record. As no suitable replacement is available, the coordinates from the withdrawn record were remapped to EquCab3.0 using UCSC Liftover.

## Sheet: Supplementary Table 2
Supplementary Table 2. Prioritizied variants for ectopic lentis using a candidate gene approach and investigating recessive and de novo hypotheses.
Model used to identify variant (Recessive or De novo)	Gene	Chromosome	NCBI Chromosome	Position (EquCab3.0)	Reference Allele	Alternate Allele	Allele ratio from PRJEB47918 (WT/WT : WT/Alt : Alt/Alt)	Variant IDs	Location with in the gene
Recessive	ADAMTS17	chr1	NC_009144.3	106233156	A	C	413:75:2	rs1146471596	intronic
Recessive	PLOD1	chr2	NC_009145.3	39932946	C	T	366:90:20	rs1149060932	intronic
Recessive	PLOD1	chr2	NC_009145.3	39942146	C	G	376:98:19	rs68569188	intronic
Recessive	PLOD1	chr2	NC_009145.3	39944640	C	T	243:59:7	rs1151782070	intronic
Recessive	PLOD1	chr2	NC_009145.3	39946442	G	A	369:99:18	rs1138484120	intronic
Recessive	PLOD1	chr2	NC_009145.3	39946680	G	A	371:97:21	rs1144162617	intronic
Recessive	PLOD1	chr2	NC_009145.3	39947108	G	A	363:98:20	rs1141697270, AX-104613888	intronic
Recessive	PLOD1	chr2	NC_009145.3	39947330	C	G	379:93:20	rs1152264971	intronic
Recessive	MTHFR	chr2	NC_009145.3	40056213	G	C	343:80:10	rs1144723157	intronic
Recessive	MTHFR	chr2	NC_009145.3	40066043	G	T	324:116:18	rs1140244860	intronic, potential splice site variant: XM_005607523.3:r.(1629-10G>T)
Recessive	SKI	chr2	NC_009145.3	47863883	CAAAAAAAAAAAAAAAAAGACTCAC	CAAAAAAAAAAAAAAAAAAGACTCAC	0:0:0	rs3433678633	intronic
Recessive	OAF	chr7	NC_009150.3	28460426	C	T	372:87:22	rs1147266205	intronic
Recessive	OAF	chr7	NC_009150.3	28460666	C	T	357:100:22	rs1149146110	intronic
Recessive	SKI	chr2	NC_009145.3	47837909	C	G	343:120:25	rs1148470900, AX-103910100	intronic
Recessive	SKI	chr2	NC_009145.3	47854696	G	A	330:114:30	rs1144669636, AX-103380300	intronic
Recessive	SKI	chr2	NC_009145.3	47856409	T	C	327:128:34	rs1150436475, AX-103844672	intronic
Recessive	SKI	chr2	NC_009145.3	47857976	G	A	323:126:33	rs1143158241, AX-104313186	intronic
Recessive	SKI	chr2	NC_009145.3	47870543	G	A	406:60:11	rs1138303089	intronic
Recessive	SKI	chr2	NC_009145.3	47884650	T	C	349:108:27	rs1148007443	intronic
Recessive	SKI	chr2	NC_009145.3	47884879	C	G	326:118:40	rs1143661779	intronic
Recessive	SKI	chr2	NC_009145.3	47898646	T	C	327:123:31	rs1151174585	intronic
De novo	ADAMTS17	chr1	NC_009144.3	106146095	G	T	0:0:0	None	3’ UTR, XM_023651354.1:r.(6273C>T), last codon ends at nucleotide 3532.
De novo	ADAMTS17	chr1	NC_009144.3	106191744	A	C	0:0:0	None	intronic
De novo	ADAMTS17	chr1	NC_009144.3	106238395	T	C	443:36:0	rs1143003131, ss7840778342	intronic
De novo	ADAMTS17	chr1	NC_009144.3	106331944	G	C	0:0:0	None	intronic
De novo	ADAMTS17	chr1	NC_009144.3	106444831	G	A	446:44:3	rs1149498094, ss7840780475, AX-103707286	intronic
De novo	FBN1	chr1	NC_009144.3	142398596	C	T	0:0:0	None	Coding, XP_023473664.1:p.(A882V), no RS ID
De novo	HSPG2	chr2	NC_009145.3	32902910	G	T	0:0:0	None	intronic
De novo	HSPG2	chr2	NC_009145.3	32904388	GCCTCCCTCCA	GCCTCCCTCCCCTCCCTCCA	354:125:5	rs3429820406	intronic
De novo	ADAMTS18	chr3	NC_009146.3	26552499	A	G	0:0:0	None	intronic
De novo	ADAMTS18	chr3	NC_009146.3	26552501	C	T	0:0:0	None	intronic
De novo	AASS	chr4	NC_009147.3	78481816	T	G	0:0:0	None	intronic
De novo	AASS	chr4	NC_009147.3	78491745	C	T	0:0:0	None	intronic
De novo	COL2A1	chr6	NC_009149.3	66523158	A	T	435:52:2	rs1142368256	intronic
De novo	COL2A1	chr6	NC_009149.3	66524569	C	T	411:52:4	rs1149877027	intronic
De novo	COL2A1	chr6	NC_009149.3	66525036	G	A	423:46:5	rs1150884891	intronic, potential splice site variant: NM_001081764.1:r.(2231+12G>A)
De novo	COL2A1	chr6	NC_009149.3	66527371	C	T	431:50:6	rs1136808479	intronic
De novo	COL2A1	chr6	NC_009149.3	66531802	C	T	415:52:6	rs1136276214	intronic
De novo	COL2A1	chr6	NC_009149.3	66532690	G	A	426:52:7	rs1150176829	synonymous variant, XP_005611139.1:p.(Pro352Pro)
De novo	COL2A1	chr6	NC_009149.3	66533511	G	A	426:56:5	rs1142787309	intronic
De novo	COL2A1	chr6	NC_009149.3	66534182	C	A	425:52:5	rs1141055654	intronic
De novo	COL2A1	chr6	NC_009149.3	66535912	A	G	431:52:5	rs1144648631	intronic
De novo	COL2A1	chr6	NC_009149.3	66540052	C	T	431:49:5	rs1151574764	intronic
De novo	NECTIN1	chr7	NC_009150.3	27936887	G	A	418:59:3	rs1146307692	intronic
De novo	NECTIN1	chr7	NC_009150.3	27938892	G	T	439:44:1	rs1145508659	intronic
De novo	NECTIN1	chr7	NC_009150.3	27941305	A	G	444:42:1	rs1148915622	intronic
De novo	NECTIN1	chr7	NC_009150.3	27945582	A	T	429:44:1	rs1141459845	intronic
De novo	NECTIN1	chr7	NC_009150.3	27952284	G	C	429:50:0	rs1145308320	intronic
De novo	NECTIN1	chr7	NC_009150.3	27952713	C	T	438:41:0	rs1138941720	intronic
De novo	NECTIN1	chr7	NC_009150.3	27958897	G	C	430:41:1	rs1140745159	intronic
De novo	NECTIN1	chr7	NC_009150.3	27966788	C	T	0:0:0	None	intronic
De novo	NECTIN1	chr7	NC_009150.3	27969536	C	T	441:47:0	rs1138899498	intronic
De novo	NECTIN1	chr7	NC_009150.3	27970221	C	T	418:46:0	rs1140912066	intronic
De novo	NECTIN1	chr7	NC_009150.3	27971930	G	C	442:44:0	rs1145634563	intronic
De novo	NECTIN1	chr7	NC_009150.3	27974668	C	T	408:45:0	rs1143599713	intronic
De novo	NECTIN1	chr7	NC_009150.3	27975350	T	C	436:44:2	rs1143039251	intronic
De novo	NECTIN1	chr7	NC_009150.3	27975749	C	T	423:43:0	rs3430522658	intronic
De novo	NECTIN1	chr7	NC_009150.3	27982419	C	T	437:38:0	rs68647208	intronic
De novo	NECTIN1	chr7	NC_009150.3	27984297	C	A	435:51:0	rs1145147274, AX-103362235	intronic
De novo	NECTIN1	chr7	NC_009150.3	27984514	C	T	421:51:0	rs1146290817	intronic
De novo	NECTIN1	chr7	NC_009150.3	27988951	C	G	415:50:1	rs1151700561	intronic
De novo	NECTIN1	chr7	NC_009150.3	27989962	C	T	368:43:1	rs3431464465	5’ UTR – XM_001503231.5:r.(110C>T), the first codon starts at nucleotide 909
De novo	OAF	chr7	NC_009150.3	28471356	A	C	0:0:0	None	3’ UTR – XM_001501247.5:r.(1434A>C), the last codon ends at nucleotide 1287
De novo	ADAMTS10	chr7	NC_009150.3	54841785	T	C	287:125:46	rs1143041129, AX-104601302	intronic
De novo	ADAMTS10	chr7	NC_009150.3	54846181	C	T	287:150:52	rs1139986092	intronic
De novo	ADAMTS10	chr7	NC_009150.3	54847325	G	A	285:152:47	rs1137680300, AX-103282915	intronic
De novo	ADAMTS10	chr7	NC_009150.3	54857317	C	G	287:137:42	rs3430535912	intronic
De novo	ADAMTS10	chr7	NC_009150.3	54858667	A	G	0:0:0	None	intronic
De novo	PAX6	chr7	NC_009150.3	99785562	T	C	463:34:0	rs1137210780, AX-104394440	intronic
De novo	PAX6	chr7	NC_009150.3	99787550	C	T	447:34:0	rs1144486646	intronic
De novo	PAX6	chr7	NC_009150.3	99787701	C	A	457:31:0	rs1142303041	intronic
De novo	PAX6	chr7	NC_009150.3	99787930	T	G	455:32:1	rs1151575198, AX-103163762	intronic
De novo	PAX6	chr7	NC_009150.3	99791121	T	C	430:59:2	rs394007053	intronic
De novo	PAX6	chr7	NC_009150.3	99791498	G	C	462:32:0	rs3435196128	intronic
De novo	PAX6	chr7	NC_009150.3	99792101	G	A	455:35:0	rs1148616002	intronic
De novo	PAX6	chr7	NC_009150.3	99795045	A	C	305:13:0	rs3433167915	intronic
De novo	PAX6	chr7	NC_009150.3	99800246	G	A	406:30:0	rs1143080509	Variant in 5’ UTR of two transcripts (XM_023646555.1 and XM_023646556.1), in intron four of six transcripts (XM_023646558.1, XM_023646559.1, XM_023646560.1, XM_023646561.1, XM_023646562.1, and XM_023646563.1)
De novo	PAX6	chr7	NC_009150.3	99800872	A	G	412:28:0	rs3435196447	Variant in 5’ UTR of two transcripts (XM_023646555.1 and XM_023646556.1), in intron four of six transcripts (XM_023646558.1, XM_023646559.1, XM_023646560.1, XM_023646561.1, XM_023646562.1, and XM_023646563.1)
De novo	PAX6	chr7	NC_009150.3	99804002	C	T	443:31:0	rs1151499491	In intron two of six transcripts (XM_023646558.1, XM_023646559.1, XM_023646560.1, XM_023646561.1, XM_023646562.1, and XM_023646563.1)
De novo	PAX6	chr7	NC_009150.3	99806202	A	C	445:30:0	rs1141839903	In exon 2 untranslated region of six transcripts (XM_023646558.1, XM_023646559.1, XM_023646560.1, XM_023646561.1, XM_023646562.1, and XM_023646563.1)
De novo	PAX6	chr7	NC_009150.3	99808768	C	G	440:28:0	rs68820558	intronic
De novo	PAX6	chr7	NC_009150.3	99809793	C	T	430:27:0	rs1138958569	intronic
Variants in bold were not found in the public repository and fit the model tested in the study population including the case and 18 control horses.

## Sheet: Supplementary Table 3
Supplementary Table 3: Comparative Genomics: human cases with the FBN1:p.(Ala882Val) variant and the corresponding reported phenotypes.
Reported Diagnosis	FBN1 Variant	Age	Sex	Ethnicity	Skeletal Features	Ocular Features	Ectopia Lentis	Cardiac Features	Aortic root Z-score >=2, Aortic Aneurism, or Aortic root dissection	Dura	Pulmonary Involvement	Epidermal Features	Family History	Meets Ghent Criteria (De Paepe et al. 1996)	Meets Ghent Criteria (Loeys et al. 1996)	Other	Note	Reference
Unspecified fibrilliopathy	Ala882Val	between 23 and 26	Male	ns	minor	Yes	Yes	no	ns	ns	minor	minor	family history reported but diagnosis not specified	No	ns	N/A		Turner et al. 2009
Ectopia lentis	Ala882Val	34	ns	ns	minor	Major	Yes	no	ns	ns	ns	minor	no	ns	ns	Diagnosed with Ectopia Lentis		Comeglio et al. 2007
Marfan syndrome	Ala882Val	28	ns	ns	minor	Major	ns	Major	ns	ns	ns	ns	yes	Yes	ns	N/A		Comeglio et al. 2007
Marfan syndrome	Ala882Val	24	ns	ns	minor	Major	ns	Major	ns	2	no	no	no	Yes	ns	N/A		Loeys et al. 2004
Marfan syndrome	Ala882Val	ns	ns	Taiwanese	No	Yes	ns	Yes	ns	Yes	ns	ns	ns	Yes	ns	N/A		Hung et al. 2009
Aortic dissection	Ala882Val	45	Male	ns	ns	Myopia	ns	Major	Yes (Dissection)	ns	ns	ns	ns	ns	ns	N/A		Tan et al. 2017
Aortic aneurysm	Ala882Val	53	Male	ns	ns	ns	ns	Yes	Yes (Aneurysm)	ns	ns	ns	Yes	ns	ns	Wrist and thumb sign postive, inguinal hernia	Relatives had aortic aneurysm or dissection	Overwater et al. 2018
Aortic aneurysm	Ala882Val	ns	ns	ns	ns	ns	ns	Yes	Yes (Aneurysm)	ns	ns	ns	unknown	ns	ns	N/A		Weerakkody et al. 2018
Aortic dissection	Ala882Val	ns	ns	ns	ns	ns	ns	ns	ns	ns	ns	ns	ns	ns	ns	N/A	Unknown how many affected individuals were identified with this variant	Li et al. 2018
Marfan syndrome or Marfan-like syndrome	Ala882Val	ns	ns	ns	ns	ns	ns	ns	ns	ns	ns	ns	ns	ns	ns	Diagnostic criteria not specified	Unaffected, non-carrier family member also reported	Howarth et al. 2007
Marfan syndrome	Ala882Val	ns	ns	ns	ns	ns	ns	ns	ns	ns	ns	ns	ns	ns	ns	Diagnostic criteria not specified	Patients from Robinson et al. 2012 are related	Robinson et al. 2012
Marfan syndrome	Ala882Val	ns	ns	ns	ns	ns	ns	ns	ns	ns	ns	ns	ns	ns	ns	Diagnostic criteria not specified	Patients from Robinson et al. 2012 are related	Robinson et al. 2012
Marfan syndrome	Ala882Val	ns	Male	ns	ns	ns	ns	ns	ns	ns	ns	ns	ns	ns	ns	Diagnostic criteria not specified		Spits et al. 2006
Phenotypic and demographic data are recorded in bold when data is present.
ns = not specified
